# Supplementary material
Source: ML conference proceedings conference paper supplement (https://openreview.net/forum?id=xotfLEAF4u)
Supplement: supplementary_material [file attachment]

## 1 Appendices

2 All codes, data, and instructions for our COMPBENCH can be found in [https://github.com/](https://github.com/RaptorMai/CompBenchReview)  
3 [RaptorMai/CompBenchReview](https://github.com/RaptorMai/CompBenchReview). COMPBENCH is released under a Creative Commons Attribution  
4 4.0 License (CC BY 4.0).

5 Our supplementary materials are summarized as follows:

- 6 • **Appendix A:** Limitations, social impacts, ethical considerations, and license of assets.
- 7 • **Appendix B:** COMPBENCH curation details (cf. §4.2 and §5.1 in the main text).
- 8 • **Appendix C:** Training details on LLaVA-1.6 (cf. §5.3 in the main text).
- 9 • **Appendix D:** More qualitative examples.

## 10 A Discussions

### 11 A.1 Limitations

12 While we conducted a human evaluation study to establish the upper bound performance on COMP-  
13 BENCH, the study is currently limited to 140 samples assessed by five evaluators (cf. §5.3 in the main  
14 text). We plan to expand the study to a larger scale in future work.

### 15 A.2 Social impacts

16 COMPBENCH evaluates the comparative reasoning abilities of MLLMs in images. A potential  
17 negative impact of our work is that malicious users might exploit our concept (i.e., comparison) to  
18 compare ethical or offensive content. Therefore, it is essential to incorporate effective safeguards in  
19 MLLMs to filter out any inappropriate materials.

### 20 A.3 Ethical considerations

21 All fourteen datasets (cf. **Table 1** in the main text) that we used to curate COMPBENCH adhere to  
22 strict guidelines to exclude any harmful, unethical, or offensive content. Additionally, we instruct  
23 human annotators to avoid generating any personally identifiable information or offensive content  
24 during our annotation process. Finally, we do not conduct any study to compare harmful, ethical, or  
25 offensive content between the two images.

### 26 A.4 License of assets

27 All fourteen datasets are publicly available, and **Table 1** details the licensing information for the assets  
28 in each dataset. We release our COMPBENCH under a Creative Commons Attribution 4.0 License  
29 (CC BY 4.0) to enhance global accessibility and foster innovation and collaboration in research.

## 30 B COMPBENCH Curation Details

### 31 B.1 Annotation Details

32 We create UI interfaces for annotation using Python in Jupyter Notebook and store the annotations in  
33 JSON files. In the following sections, we provide detailed descriptions of the annotation process for  
34 each dataset, which are omitted in the main text.

35 **MagicBrush** [18] is a large-scale, manually annotated dataset for instruction-guided real image  
36 editing. For each image, MagicBrush utilizes DALL-E 2 [13] to generate an edited version of the  
37 image based on language instructions, such as “let the flowers in the vase be blue.” Our goal is to  
38 identify pairs of similar images. We thus use CLIP [12] to evaluate the visual similarity between the

| Public Dataset    | License                       |
|-------------------|-------------------------------|
| MIT-States [5]    | N/A                           |
| Fashionpedia [7]  | CC BY 4.0                     |
| VAW [11]          | Adobe Research License        |
| CUB-200-2011 [16] | CC BY                         |
| Wildfish++ [20]   | N/A                           |
| MagicBrush [18]   | CC BY 4.0                     |
| Spot-the-diff [6] | N/A                           |
| CelebA [10]       | Research-only, non-commercial |
| FER-2013 [3]      | N/A                           |
| SoccerNet [2]     | MIT License                   |
| CompCars [17]     | Research-only, non-commercial |
| NYU-Depth V2 [14] | N/A                           |
| VQAv2 [4]         | CC BY 4.0                     |
| Q-Bench2 [19]     | N/A                           |

Table 1: License of Assets.

39 original and edited images. Only pairs exceeding a predetermined similarity threshold are selected as  
40 candidate samples for our COMPBENCH. For each selected pair, we then construct a multiple-choice  
41 question to ask the difference between two images in the pairs. Concretely, we first use GPT-4V [1]  
42 to extract all relevant objects and their attributes from the edited image with the following prompt:

43 “Please extract as many components as possible from the provided images. The  
44 following examples illustrate some potential components, but the list is not exhaus-  
45 tive. Only provide the component names, separated by commas. If a human or  
46 an animal is shown in the images and features such as hair, eyes, hands, mouth,  
47 ears, and legs are visible, ensure to include them. Similarly, try to identify all  
48 components in as much detail as possible.

49 Examples of components: leg, eye, ear, food, pillow, flower, plate, window, door,  
50 chair, dining table, sofa, banana, bowl, sugar, blender, berry, lizard, watermelon,  
51 motorcycle, apple, curtain, cookies, cake, hair, hat, dresses, bacon, butter, jam,  
52 bread, surfboard, t-shirt, pants, hands, fridge, plants, cabinet, sink, car, girl, boy.”

53 We treat objects and their attributes (if found) as options for the questions. However, GPT-4V [1]  
54 may not capture all relevant objects (options) in the images. We thus request human annotators to add  
55 as many relevant options as possible. Finally, annotators are required to select the obvious difference  
56 between two images as the correct answer among options and verify the quality of the generated  
57 samples (Figure 1).

58 **Spot-the-diff** [6] offers video-surveillance image pairs from outdoor scenes, along with descriptions  
59 and pixel-level masks of their differences. Similar to MagicBrush, we aim to construct a multiple-  
60 choice question to find the obvious difference between the two images. We first prompt the text-only  
61 GPT-4 to extract the potentially correct objects from the descriptions of the differences using the  
62 following prompt:

63 “These sentences describe the differences between the two images. Extract the  
64 objects from these sentences. for example, [“there are more people”, “the car  
65 moved”], you should return “people, car”. Please only provide the answer without  
66 any explanation and separate the answer names by commas.”

67 Given the extracted objects and the images, GPT-4V is tasked with finding relevant options in the  
68 images based on the following prompt:

69 “Please list all the objects and attributes associated with the image, for example,  
70 black cars, people, trees, white trucks, and yellow poles. Only provide one attribute  
71 (adjective) per object. Please only provide the answer without any explanation

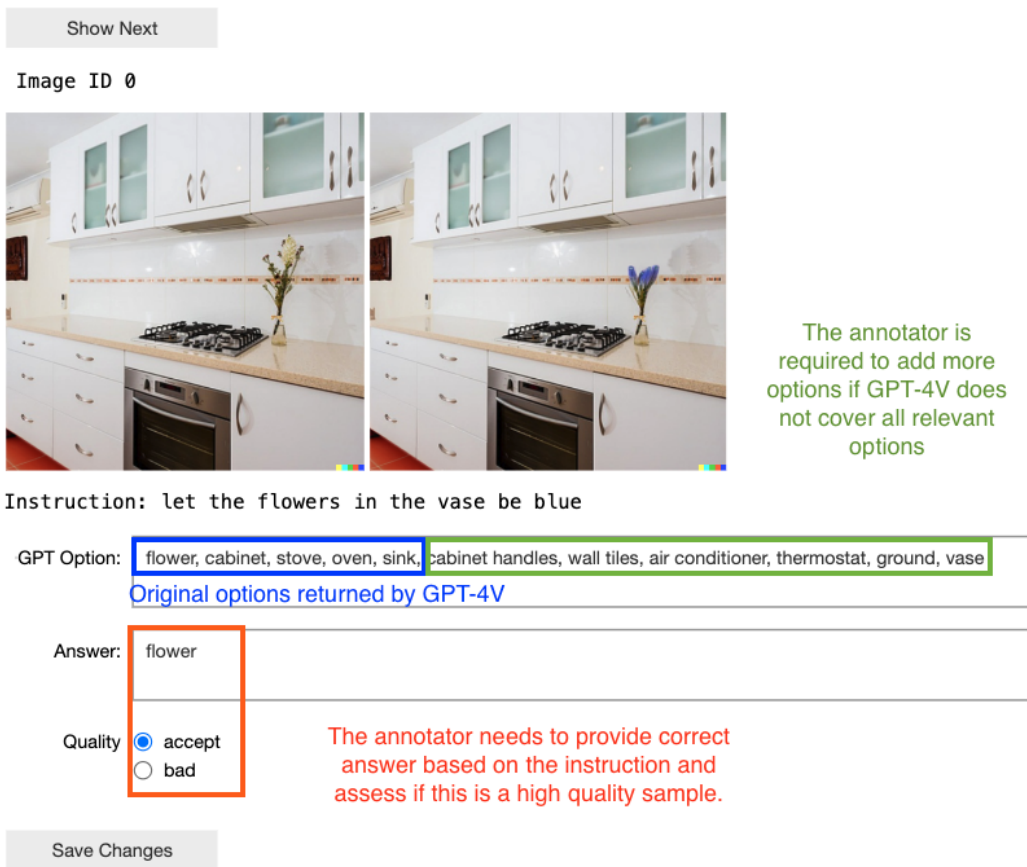

Figure 1: Annotation Interface for MagicBrush.

72 and separate the answer names with commas. Ensure to include these objects:  
 73 [OBJECTS FROM LAST STEP]”

74 We then instruct human annotators to include additional options (if necessary) and identify the most  
 75 evident difference between two images from the available options as the correct answer (Figure 2).

76 **MIT-States** [5] includes 245 objects with 115 visual attributes or states from online sources such  
 77 as food or device websites. Each folder in this dataset is named by (adjective, noun), e.g., tall tree,  
 78 where the adjective describes the state or the attributes and the noun is the object. All the images in  
 79 this folder share the same adjective and noun. We apply rule-based approaches to generate questions  
 80 about relative degrees of attributes or states between objects (e.g., “Which tree is taller?”). We then  
 81 present the questions with the corresponding images in this folder to annotators. The annotators are  
 82 tasked to select pairs from all the images, label the correct answers (binary: left/right), and filter out  
 83 any irrelevant or nonsensical questions about the images. In addition, the annotators are required to  
 84 determine the attribute or state types by selecting from the following options: Size, Color, Texture,  
 85 Shape, Pattern, State, or None. We filter out examples where the type or answer is None. The  
 86 annotation UI interface is shown in Figure 3.

87 **VAW** [11] provides a large-scale collection of 620 unique attributes, including color, shape, and  
 88 texture. We process VAW in the same manner as MIT-States, as detailed in Figure 3.

89 **CUB-200-2011** [16] catalogs 15 bird parts and their attributes (e.g., “notched tail”). We group images  
 90 by species with the same attributes (e.g., “curved bill”) and extract visually similar image pairs from  
 91 each group. We then prompt GPT-4 to transform visual attributes into questions that compare them  
 92 using the following in-context prompt:

Image ID 20

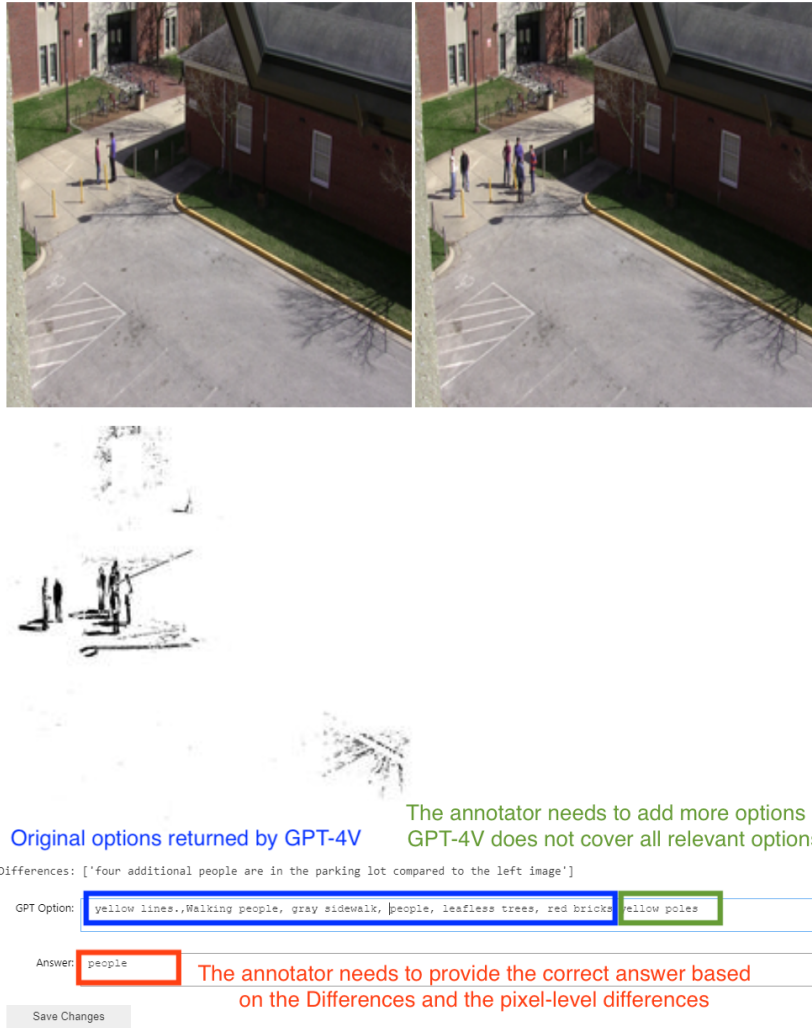

Figure 2: Annotation Interface for Spot-the-diff.

93 “I want to turn some text describing the attributes of birds into a question comparing  
94 these attributes between birds in two different images. Here are some examples:  
95 Attribute: has\_bill\_shape::hooked, Questions: Which bird has a more hooked bill?  
96 Attribute: has\_crown\_color::brown, Questions: Which bird has more brown on its  
97 crown?

98 Please turn this list of attributes into these questions in this format or style. I want  
99 a dictionary format output. [ATTRIBUTE LIST]”

100 The annotators receive all images in each group along with corresponding comparative questions  
101 generated by GPT-4. They are asked to select the pairs from the images and label the correct answers  
102 (binary: left/right). The annotation interface is shown in Figure 4.

103 **Wildfish++** [20] details 22 characteristics (e.g., “brown pelvic fins”) of various fish species and  
104 provides detailed descriptions of the differences between two visually similar species. Using the  
105 characteristics and the descriptions of difference, we first ask annotators to generate comparative  
106 questions (e.g., “Which fish has lighter brown pelvic fins?”). Subsequently, we pass all images from  
107 the two similar species along with the corresponding question to the annotators. They select one  
108 image from each group to form a pair and label the correct answers as either left or right (Figure 5).

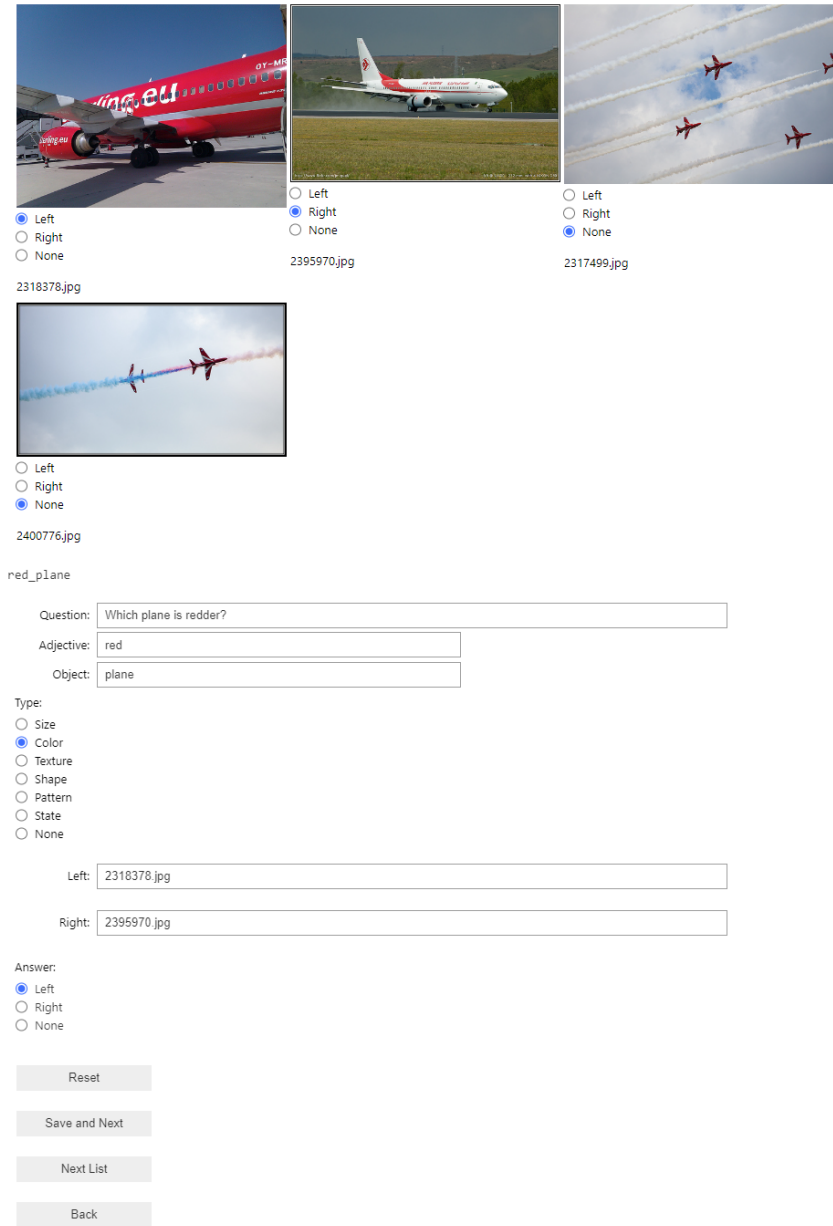

Figure 3: Annotation Interface for MIT-States and VAW.

109 **Fashionpedia** [7] is tailored to clothing and accessories and contains 27 types of apparel along  
 110 with 294 detailed attributes. We group images by (attribute, type), e.g., square neckline. We apply  
 111 rule-based approaches to generate questions about relative degrees of attributes (e.g., “Which neckline  
 112 is more square?”) for each group. We then present images of the same type with different attributes,  
 113 such as “square neckline” and “oval neckline” to the annotators. The annotators are required to select  
 114 one image from each group to form a pair, choose one between questions from two attributes, and  
 115 label the correct answer (binary: left/right). The annotation UI interface is shown in **Figure 6**.

116 **NYU-Depth V2** [14] features indoor scenes with object segments and depths. Using the segmentation  
 117 maps, we identify objects within each image and group images containing the same objects. We  
 118 apply rule-based approaches to generate questions about spatial relative comparisons (e.g., “Which  
 119 [OBJECT] is closer to the camera?”). The annotator needs to select pairs from all the images in the  
 120 same group and label the correct answers either left or right (**Figure 7**).

121 **CelebA** [10] is a large-scale facial attributes dataset featuring over 200K celebrity images, each  
122 annotated with 40 attributes. We focus on images labeled with the “smiling” attribute, as it is the only  
123 attribute related to the emotion in the dataset. We generate a comparative question such as “Which  
124 person smiles more?”. The annotators are tasked with selecting pairs from all images with the smiling  
125 attribute and labeling the correct answers either left or right (Figure 8).

126 **FER-2013** [3] contains grayscale images along with categories describing the emotion of the per-  
127 son, including Angry, Disgust, Fear, Happy, Sad, Surprise, and Neutral. We leverage rule-based  
128 approaches to generate questions about relative emotional comparisons (e.g., “Which person looks  
129 more [EMOTIONAL ADJECTIVE]?”). The annotators are required to select pairs from images that  
130 share the same emotional attribute and determine the correct answers as either left or right (Figure 9).

131 **SoccerNet** [2], **CompCars** [17], **VQAv2** [4], **Q-bench2** [19] are automatically processed to generate  
132 samples for COMPBENCH using their metadata and CLIP visual similarity. For more details, please  
133 refer to §4.2 of the main text.

## 134 B.2 Language Prompts for MLLMs

135 Table 2 summarizes our language prompts for evaluating MLLMs. We observe that in the case of  
136 SoccerNet [2], Gemini1.0-pro [15] always predicts the answer “Left” for binary questions (e.g.,  
137 “These are two frames related to [SOCCER\_ACTION] in a soccer match. Which frame happens  
138 first? Please only return one option from (Left, Right) without any other words.”). We thus prompted  
139 the Gemini to answer open-ended questions (as shown in Table 2) instead. We then task human  
140 evaluators with verifying whether its responses (i.e., textual descriptions) match the ground-truth  
141 answers to calculate its performance. For a fair comparison, we apply the same open-ended questions  
142 to other models (i.e., GPT-4V [1], LLaVA-1.6 [9], VILA-1.5 [8]) and report their accuracies.

## 143 B.3 Model Evaluation

144 We use official APIs to evaluate proprietary MLLMs, GPT-4V [1] and Gemini [15]. For GPT-4V,  
145 we use the version of gpt-4-turbo<sup>1</sup>. For Gemini, we use the Gemini1.0 Pro Vision<sup>2</sup>. For open source  
146 models such as LLaVa-1.6-34b [9]<sup>3</sup> and VILA-1.5-40b [8]<sup>4</sup>, we utilize their official source codes and  
147 conduct inference on NVIDIA RTX 6000 Ada GPUs.

## 148 B.4 Human Annotators & Evaluators

149 We recruited five in-house human annotators from our research team to work on COMPBENCH. The  
150 annotators are instructed to avoid generating any personally identifiable information or offensive  
151 content during the annotation process. Furthermore, we recruited another five human evaluators, who  
152 were not involved in the annotation, to measure the upper bound performance on COMPBENCH. The  
153 workloads for annotation and evaluation were distributed equally among annotators and evaluators.

## 154 C Training details on LLaVA-1.6

155 As discussed in §5.3 of the main text, we conduct a study to evaluate whether fine-tuning enhances  
156 the comparative capabilities of MLLMs. Concretely, we focus on two relativities: Temporality and  
157 Quantity. For temporality, we construct a total of 20.6K training examples from SoccerNet [2],  
158 following the similar data collection and annotation protocol described in §4.2.5 of the main text. For  
159 quantity, we curate a total training set of 20.9K samples from VQAv2 [4], based on the similar data  
160 collection and annotation pipeline in §4.2.7 of the main text. We fine-tune LLaVA-1.6-34b [9] on  
161 each of these training datasets separately, using LoRA techniques. We follow similar hyperparameter

<sup>1</sup><https://platform.openai.com/docs/models/gpt-4-turbo-and-gpt-4>

<sup>2</sup><https://ai.google.dev/gemini-api/docs/models/gemini#gemini-1.0-pro-vision>

<sup>3</sup><https://github.com/haotian-liu/LLaVA>

<sup>4</sup><https://github.com/Efficient-Large-Model/VILA>

| Dataset                           | Model                                            | Lagnauge Prompt                                                                                                                                                                                                                                                                                                                                                                                                        |
|-----------------------------------|--------------------------------------------------|------------------------------------------------------------------------------------------------------------------------------------------------------------------------------------------------------------------------------------------------------------------------------------------------------------------------------------------------------------------------------------------------------------------------|
| ST, FA, VA, CU,<br>WF, CE, FE, ND | GPT-4V<br>LLaVA-1.6<br>VILA-1.5                  | “[QUESTION] If you choose the first image, return Left, and if you choose the second image, return Right. Please only return either Left or Right without any other words, spaces, or punctuation.”                                                                                                                                                                                                                    |
|                                   | Gemini1.0-pro                                    | “[QUESTION] If you choose the first image, return First, and if you choose the second image, return Second. Please only return either First or Second without any other words, spaces, or punctuation.”                                                                                                                                                                                                                |
| MB, SD                            | GPT-4V<br>LLaVA-1.6<br>VILA-1.5<br>Gemini1.0-pro | “What is the most obvious difference between the two images? Choose from the following options. If there is no obvious difference, choose None. Options: None, [OPTIONS]. Please only return one of the options without any other words. ”                                                                                                                                                                             |
|                                   | GPT-4V<br>LLaVA-1.6<br>VILA-1.5<br>Gemini1.0-pro | “These are two frames related to [SOCCER_ACTION] in a soccer match. Which frame happens first?”                                                                                                                                                                                                                                                                                                                        |
| CC                                | GPT-4V<br>LLaVA-1.6<br>VILA-1.5                  | “Based on these images, which car is newer in terms of its model year or release year? Note that this question refers solely to the year each car was first introduced or manufactured, not its current condition or usage. If you choose the first image, return Left, and if you choose the second image, return Right. Please only return either Left or Right without any other words, spaces, or punctuation.”    |
|                                   | Gemini1.0-pro                                    | Based on these images, which car is newer in terms of its model year or release year? Note that this question refers solely to the year each car was first introduced or manufactured, not its current condition or usage. If you choose the first image, return First, and if you choose the second image, return Second. Please only return either First or Second without any other words, spaces, or punctuation.” |
| VQ                                | GPT-4V<br>LLaVA-1.6<br>VILA-1.5<br>Gemini1.0-pro | “[QUESTION] If the second image has more, return Right. If the first image has more, return Left. If both images have the same number, return Same. Please only return either Left or Right or Same without any other words, spaces, or punctuation.”                                                                                                                                                                  |
| QB                                | GPT-4V<br>LLaVA-1.6<br>VILA-1.5<br>Gemini1.0-pro | “[QUESTION] Options: [OPTIONS]”                                                                                                                                                                                                                                                                                                                                                                                        |

Table 2: **Language prompts for evaluating MLLMs.** ST: MIT-States [5], FA: Fashionpedia [7], VA: VAW [11], CU: CUB-200-2011 [16], WF: Wildfish++ [20], MB: MagicBrush [18], SD: Spot-the-diff [6], CE: CelebA [10], FE: FER-2013 [3], SN: SoccerNet [2], CC: CompCars [17], ND: NYU-Depth V2 [14], VQ: VQAv2 [4], QB: Q-Bench2 [19].

162 settings as those provided in the official LLaVA source codes. For instance, batch size/the number of  
163 epochs/learning rate are 16/3/2e-5, respectively. See the training script in our GitHub repository for  
164 the complete configuration. All models are fine-tuned on four NVIDIA RTX 6000 Ada GPUs.

## 165 **D More qualitative examples**

166 In addition to the main text, we show more qualitative examples from each of fourteen datasets in  
167 **Figure 10, Figure 11, Figure 12, Figure 13, and Figure 14.** We observe that GPT-4V, one of the  
168 leading MLLMs, often faces challenges across a range of relative comparison tasks.



Left  
 Right  
 None

test\10\_14\Indigo\_Bu



Left  
 Right  
 None

test\10\_14\Indigo\_Bu



Left  
 Right  
 None

test\10\_14\Indigo\_Bu



Left  
 Right  
 None

test\10\_14\Indigo\_Bu



Left  
 Right  
 None

test\10\_14\Indigo\_Bu



Left  
 Right  
 None

test\10\_14\Indigo\_Bu



Left  
 Right  
 None

test\10\_14\Indigo\_Bu



Left  
 Right  
 None

test\10\_14\Indigo\_Bu



Left  
 Right  
 None

test\10\_14\Indigo\_Bu



Left  
 Right  
 None

test\10\_14\Indigo\_Bu



Left  
 Right  
 None

test\10\_14\Indigo\_Bu

---

ias\_wing\_color::blue

Question:

Left:

Right:

Answer:

Left  
 Right  
 None

Figure 4: Annotation Interface for CUB-200-2011.



Left: Pseudanthias\_tuka  
Right: Pseudanthias\_pascalus

|                                                                                                                                                                                                       |                                                                                                                                                                                                       |                                                                                                                                                                                                        |                                                                                                                                                                                                         |
|-------------------------------------------------------------------------------------------------------------------------------------------------------------------------------------------------------|-------------------------------------------------------------------------------------------------------------------------------------------------------------------------------------------------------|--------------------------------------------------------------------------------------------------------------------------------------------------------------------------------------------------------|---------------------------------------------------------------------------------------------------------------------------------------------------------------------------------------------------------|
| <br><input type="radio"/> Left<br><input type="radio"/> Right<br><input checked="" type="radio"/> None<br>0031.jpg   | <br><input type="radio"/> Left<br><input type="radio"/> Right<br><input checked="" type="radio"/> None<br>0019.jpg   | <br><input type="radio"/> Left<br><input type="radio"/> Right<br><input checked="" type="radio"/> None<br>0054.jpg   | <br><input type="radio"/> Left<br><input type="radio"/> Right<br><input checked="" type="radio"/> None<br>0041.jpg   |
| <br><input type="radio"/> Left<br><input checked="" type="radio"/> Right<br><input type="radio"/> None<br>0027.jpg   | <br><input type="radio"/> Left<br><input type="radio"/> Right<br><input checked="" type="radio"/> None<br>0033.jpg   | <br><input type="radio"/> Left<br><input type="radio"/> Right<br><input checked="" type="radio"/> None<br>0050.jpg   | <br><input checked="" type="radio"/> Left<br><input type="radio"/> Right<br><input type="radio"/> None<br>0044.jpg   |
| <br><input type="radio"/> Left<br><input type="radio"/> Right<br><input checked="" type="radio"/> None<br>0040.jpg | <br><input type="radio"/> Left<br><input type="radio"/> Right<br><input checked="" type="radio"/> None<br>0056.jpg | <br><input type="radio"/> Left<br><input type="radio"/> Right<br><input checked="" type="radio"/> None<br>0034.jpg | <br><input type="radio"/> Left<br><input type="radio"/> Right<br><input checked="" type="radio"/> None<br>0009.jpg |

Question:

Left:

Right:

Answer:  
 Left  
 Right  
 None

Figure 5: Annotation Interface for Wildfish++.



WCFW

Left  
 Right  
 None

3a8a2d38d8e3d16b2ca9



Left  
 Right  
 None

badb9c0f2ba832076e6a



WCFW

Left  
 Right  
 None

67f807cdadb96ebc9e59



WCFW

Left  
 Right  
 None



Left  
 Right  
 None



Left  
 Right  
 None

0d25b761d9b146cfa820



ECCO FASHION

Left  
 Right  
 None

2e0668607ef88383e3fa



WESTERN CANADA FASHION WEEK

Left  
 Right  
 None

e9394b022e6a183812ed

Question:

Which coat's fit is more curved?  
 Which coat's fit is more regular?

Left:  Right:

Answer:

Left  
 Right  
 None

Reset
Save and Next
Next List
Back

Figure 6: Annotation Interface for Fashionpedia.

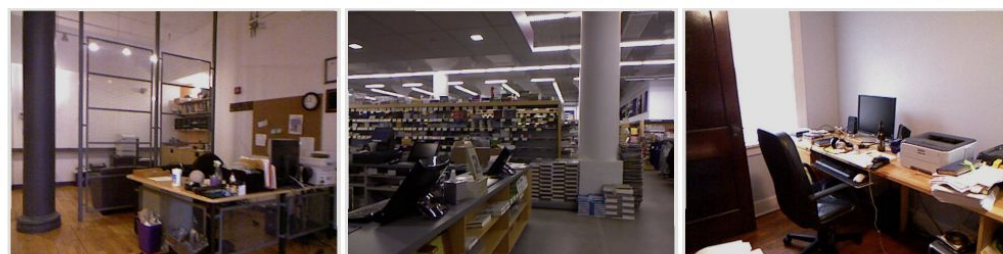

- Left
- Right
- None

21.jpg

- Left
- Right
- None

110.jpg

- Left
- Right
- None

553.jpg

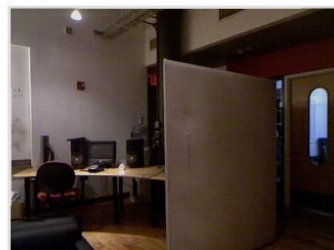

- Left
- Right
- None

29.jpg

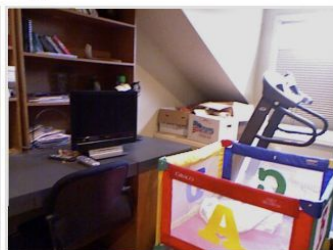

- Left
- Right
- None

1083.jpg

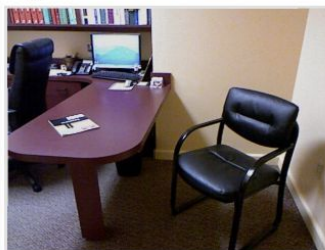

- Left
- Right
- None

608.jpg

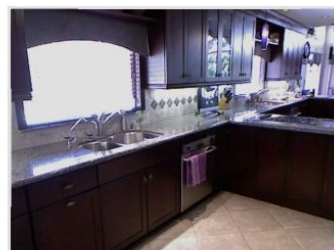

- Left
- Right
- None

765.jpg

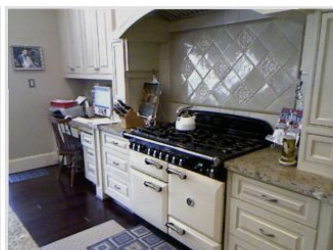

- Left
- Right
- None

753.jpg

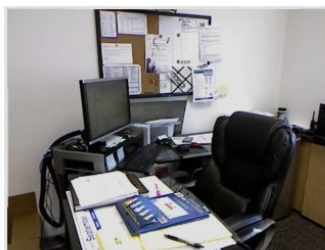

- Left
- Right
- None

620.jpg

monitor

Question: Which monitor is closer to the camera?

Left: 620.jpg

Right: 553.jpg

Answer:

- Left
- Right
- None

Reset

Save and Next

Next List

Back

Figure 7: Annotation Interface for NYU-Depth V2.

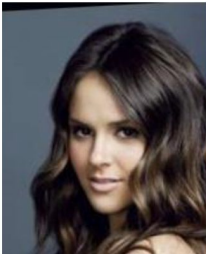

Left  
 Right  
 None

200840.jpg



Left  
 Right  
 None

047769.jpg



Left  
 Right  
 None

202299.jpg



Left  
 Right  
 None

114872.jpg



Left  
 Right  
 None

101270.jpg



Left  
 Right  
 None

043282.jpg



Left  
 Right  
 None

008254.jpg



Left  
 Right  
 None

135843.jpg



Left  
 Right  
 None

069899.jpg



Left  
 Right  
 None

109406.jpg

Question: Which person smiles more?

Left:

Right:

Answer:

Left  
 Right  
 None

Figure 8: Annotation Interface for CelebA.

|                                                                                                    |                                                                                                    |                                                                                                    |
|----------------------------------------------------------------------------------------------------|----------------------------------------------------------------------------------------------------|----------------------------------------------------------------------------------------------------|
|                   |                   |                  |
| <input type="radio"/> Left<br><input type="radio"/> Right<br><input checked="" type="radio"/> None | <input type="radio"/> Left<br><input type="radio"/> Right<br><input checked="" type="radio"/> None | <input checked="" type="radio"/> Left<br><input type="radio"/> Right<br><input type="radio"/> None |
| im1529.png                                                                                         | im153.png                                                                                          | im1530.png                                                                                         |
|                  |                  |                 |
| <input type="radio"/> Left<br><input type="radio"/> Right<br><input checked="" type="radio"/> None | <input type="radio"/> Left<br><input type="radio"/> Right<br><input checked="" type="radio"/> None | <input type="radio"/> Left<br><input checked="" type="radio"/> Right<br><input type="radio"/> None |
| im1531.png                                                                                         | im1532.png                                                                                         | im1533.png                                                                                         |

Question:

Left:

Right:

Answer:

Left  
 Right  
 None

Figure 9: Annotation Interface for FER-2013.

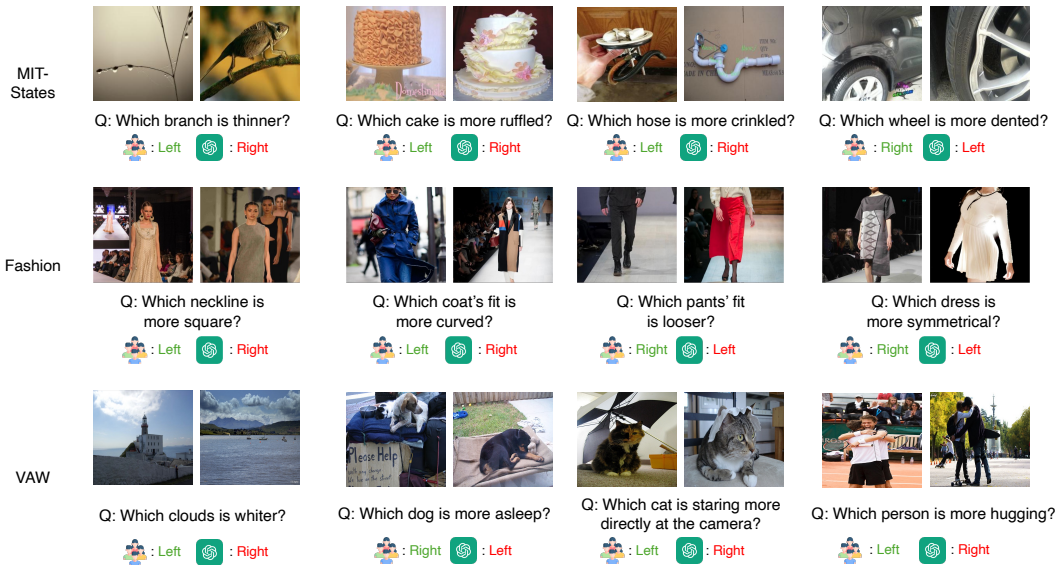

Figure 10: Qualitative examples on MIT-States [5], Fashionpedia [7], and VAW [11].

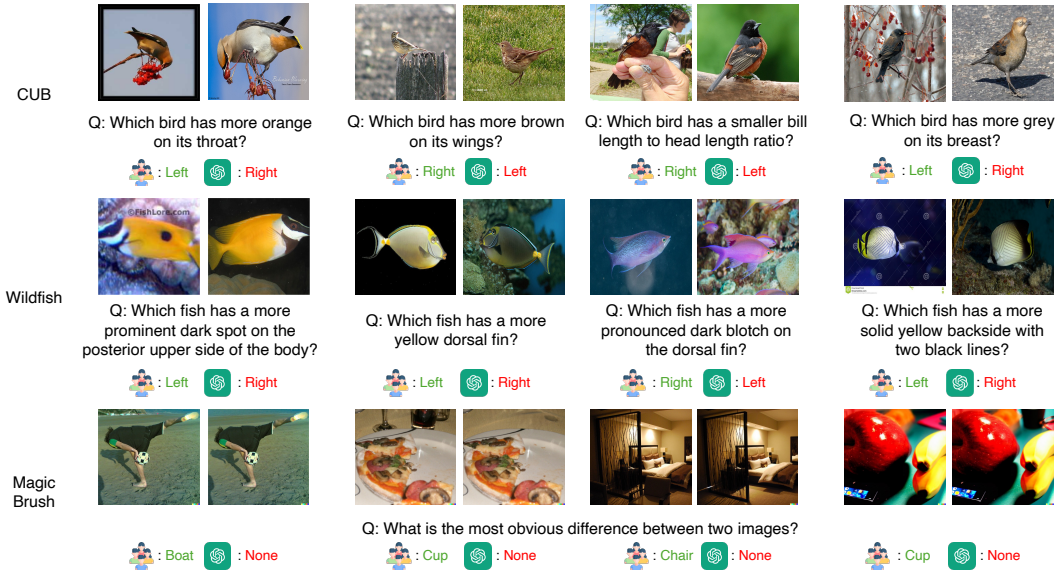

Figure 11: Qualitative examples on CUB-200-2011 [16], Wildfish++ [20], and MagicBrush [18].

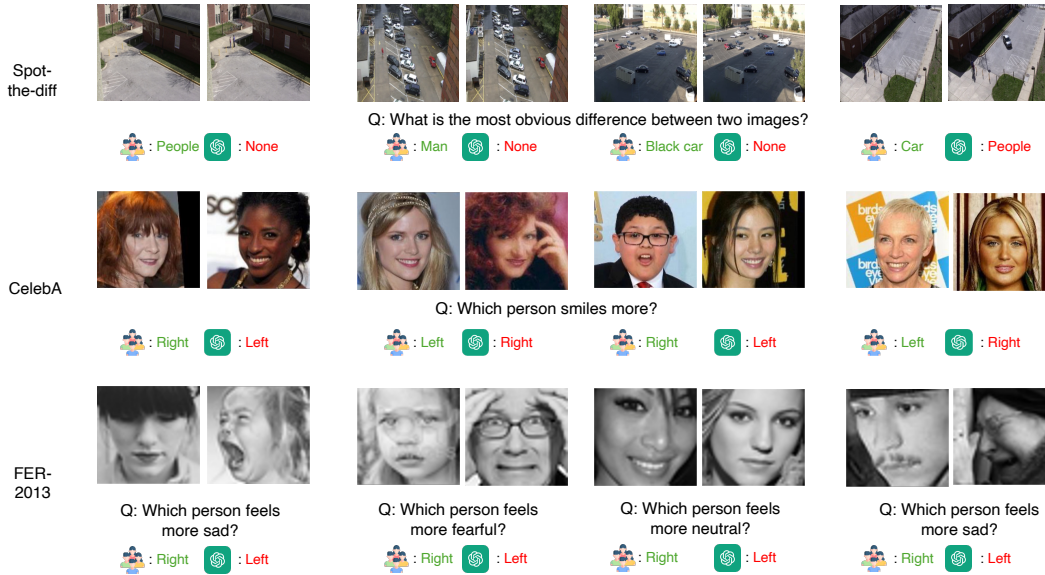

Figure 12: Qualitative examples on Spot-the-diff [6], CelebA [10], and FER-2013 [3].

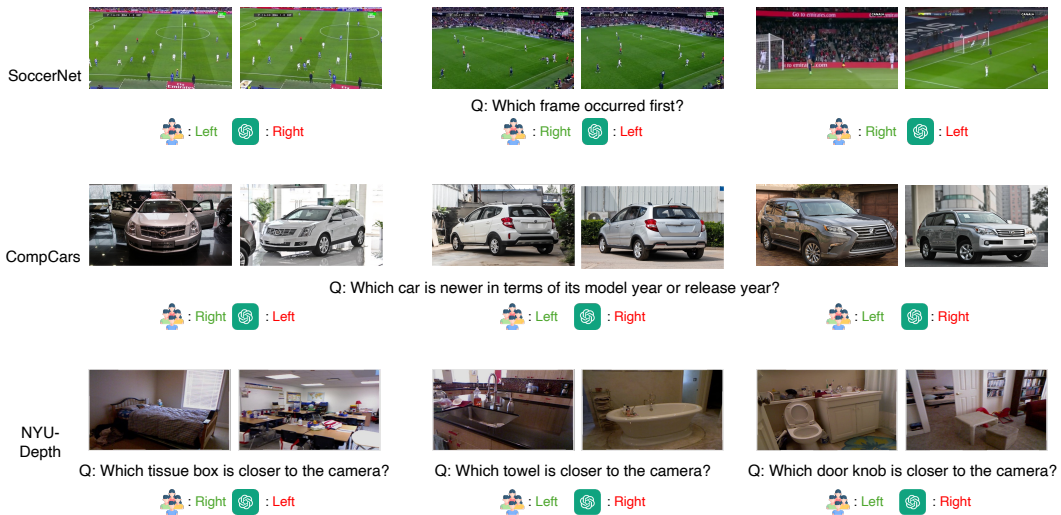

Figure 13: Qualitative examples on SoccerNet [2], CompCars [17], and NYU-Depth V2 [14].

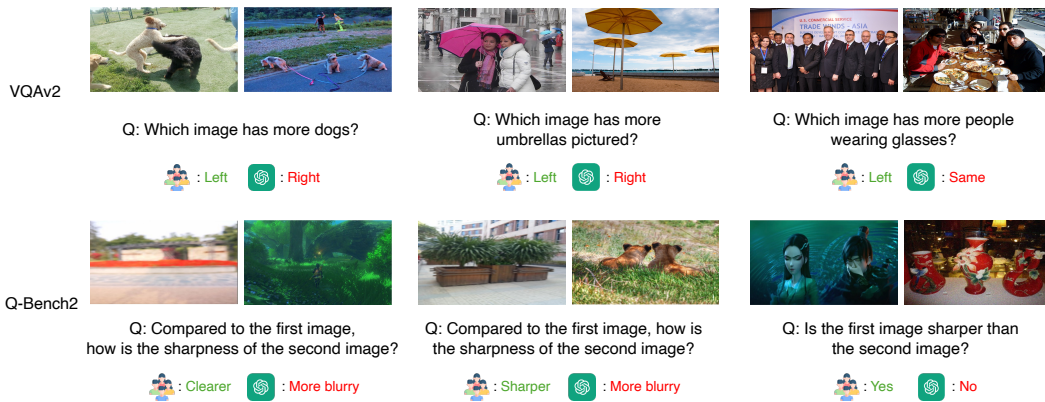

Figure 14: Qualitative examples on VQAv2 [4] and Q-Bench2 [19].

## References

- 169
- 170 [1] Josh Achiam, Steven Adler, Sandhini Agarwal, Lama Ahmad, Ilge Akkaya, Florencia Leoni Aleman,  
171 Diogo Almeida, Janko Altschmidt, Sam Altman, Shyamal Anadkat, et al. Gpt-4 technical report. *arXiv*  
172 *preprint arXiv:2303.08774*, 2023. 2, 6
- 173 [2] Silvio Giancola, Mohieddine Amine, Tarek Dghaily, and Bernard Ghanem. Socccernet: A scalable dataset  
174 for action spotting in soccer videos. In *CVPR Workshops*, 2018. 2, 6, 7, 15
- 175 [3] Ian J Goodfellow, Dumitru Erhan, Pierre Luc Carrier, Aaron Courville, Mehdi Mirza, Ben Hamner, Will  
176 Cukierski, Yichuan Tang, David Thaler, Dong-Hyun Lee, et al. Challenges in representation learning:  
177 A report on three machine learning contests. In *Neural Information Processing: 20th International*  
178 *Conference, ICONIP*, 2013. 2, 6, 7, 15
- 179 [4] Yash Goyal, Tejas Khot, Douglas Summers-Stay, Dhruv Batra, and Devi Parikh. Making the v in vqa  
180 matter: Elevating the role of image understanding in visual question answering. In *CVPR*, 2017. 2, 6, 7, 15
- 181 [5] Phillip Isola, Joseph J Lim, and Edward H Adelson. Discovering states and transformations in image  
182 collections. In *CVPR*, 2015. 2, 3, 7, 14
- 183 [6] Harsh Jhamtani and Taylor Berg-Kirkpatrick. Learning to describe differences between pairs of similar  
184 images. In *EMNLP*, 2018. 2, 7, 15
- 185 [7] Menglin Jia, Mengyun Shi, Mikhail Sirotenko, Yin Cui, Claire Cardie, Bharath Hariharan, Hartwig Adam,  
186 and Serge Belongie. Fashionpedia: Ontology, segmentation, and an attribute localization dataset. In *ECCV*,  
187 2020. 2, 5, 7, 14
- 188 [8] Ji Lin, Hongxu Yin, Wei Ping, Yao Lu, Pavlo Molchanov, Andrew Tao, Huizi Mao, Jan Kautz, Mohammad  
189 Shoeybi, and Song Han. Vila: On pre-training for visual language models. In *CVPR*, 2024. 6
- 190 [9] Haotian Liu, Chunyuan Li, Qingyang Wu, and Yong Jae Lee. Visual instruction tuning. In *NeurIPS*, 2024.  
191 6
- 192 [10] Ziwei Liu, Ping Luo, Xiaogang Wang, and Xiaoou Tang. Large-scale celebfaces attributes (celeba) dataset.  
193 In *ICCV*, 2015. 2, 6, 7, 15
- 194 [11] Khoi Pham, Kushal Kafle, Zhe Lin, Zhihong Ding, Scott Cohen, Quan Tran, and Abhinav Shrivastava.  
195 Learning to predict visual attributes in the wild. In *CVPR*, 2021. 2, 3, 7, 14
- 196 [12] Alec Radford, Jong Wook Kim, Chris Hallacy, Aditya Ramesh, Gabriel Goh, Sandhini Agarwal, Girish  
197 Sastry, Amanda Askell, Pamela Mishkin, Jack Clark, et al. Learning transferable visual models from  
198 natural language supervision. In *ICML*, 2021. 1
- 199 [13] Aditya Ramesh, Prafulla Dhariwal, Alex Nichol, Casey Chu, and Mark Chen. Hierarchical text-conditional  
200 image generation with clip latents. *arXiv preprint arXiv:2204.06125*, 1(2):3, 2022. 1
- 201 [14] Nathan Silberman, Derek Hoiem, Pushmeet Kohli, and Rob Fergus. Indoor segmentation and support  
202 inference from rgb-d images. In *ECCV*, 2012. 2, 5, 7, 15
- 203 [15] Gemini Team, Rohan Anil, Sebastian Borgeaud, Yonghui Wu, Jean-Baptiste Alayrac, Jiahui Yu, Radu  
204 Soricut, Johan Schalkwyk, Andrew M Dai, Anja Hauth, et al. Gemini: a family of highly capable  
205 multimodal models. *arXiv preprint arXiv:2312.11805*, 2023. 6
- 206 [16] Catherine Wah, Steve Branson, Peter Welinder, Pietro Perona, and Serge Belongie. The caltech-ucsd  
207 birds-200-2011 dataset. *California Institute of Technology*, 2011. 2, 3, 7, 14
- 208 [17] Linjie Yang, Ping Luo, Chen Change Loy, and Xiaoou Tang. A large-scale car dataset for fine-grained  
209 categorization and verification. In *CVPR*, 2015. 2, 6, 7, 15
- 210 [18] Kai Zhang, Lingbo Mo, Wenhu Chen, Huan Sun, and Yu Su. Magicbrush: A manually annotated dataset  
211 for instruction-guided image editing. In *NeurIPS*, 36, 2024. 1, 2, 7, 14
- 212 [19] Zicheng Zhang, Haoning Wu, Erli Zhang, Guangtao Zhai, and Weisi Lin. A benchmark for multi-modal  
213 foundation models on low-level vision: from single images to pairs. *arXiv preprint arXiv:2402.07116*,  
214 2024. 2, 6, 7, 15
- 215 [20] Peiqin Zhuang, Yali Wang, and Yu Qiao. Wildfish++: A comprehensive fish benchmark for multimedia  
216 research. *IEEE Transactions on Multimedia*, 23:3603–3617, 2020. 2, 4, 7, 14
